# Supplementary material for: Evaluation of Biochar and Inorganic Fertilizer on Soil Available Phosphorus and Bacterial Community Dynamics in Acidic Paddy Soils for Different Incubation Temperatures
Source: MDPI journal article supplement (doi:10.3390/agronomy14010026), 2023-12-21
Supplement: s1 [file s1]

**Table S1** Effect of biochar and inorganic P amendment on soil pH on different incubation intervals.

| Soil Type  | Incubation days/Treatments | HC15       | HB15       | HP15       | HC25       | HB25       | HP25       |
|------------|----------------------------|------------|------------|------------|------------|------------|------------|
| Paddy soil | 10                         | 5.29±0.01b | 7.08±0.00a | 7.12±0.00a | 5.29±0.02b | 7.13±0.01a | 7.16±0.01a |
|            | 20                         | 5.30±0.01c | 7.10±0.00b | 7.14±0.00b | 5.31±0.02c | 7.18±0.01b | 7.22±0.02a |
|            | 30                         | 5.36±0.01c | 7.28±0.02b | 7.34±0.03a | 5.36±0.02c | 7.29±0.04b | 7.30±0.00b |
|            | 40                         | 5.37±0.02c | 7.32±0.02b | 7.36±0.04b | 5.34±0.01c | 7.38±0.02a | 7.40±0.33a |
|            | 50                         | 5.39±0.35c | 7.33±0.02b | 7.31±0.38b | 5.36±0.38c | 7.39±0.04a | 7.41±0.02a |
|            | 60                         | 5.42±0.04c | 7.29±0.07b | 7.39±0.00a | 5.40±0.01c | 7.41±0.04a | 7.44±0.03a |
| Red soil   |                            | LC15       | LB15       | LP15       | LC25       | LB25       | LP25       |
|            | 10                         | 5.16±0.01b | 7.18±0.01a | 7.19±0.01a | 5.15±0.03b | 7.15±0.02a | 7.19±0.01a |
|            | 20                         | 5.17±0.01b | 7.16±0.02a | 7.22±0.01a | 5.20±0.01b | 7.19±0.02a | 7.19±0.02a |
|            | 30                         | 5.20±0.03b | 7.19±0.01a | 7.22±0.01a | 5.24±0.03b | 7.22±0.07a | 7.35±0.01a |
|            | 40                         | 5.22±0.03b | 7.25±0.07a | 7.38±0.01a | 5.31±0.02b | 7.26±0.03a | 7.35±0.03a |
|            | 50                         | 5.30±0.12c | 7.27±0.07b | 7.40±0.01a | 6.03±0.03c | 7.28±0.03b | 7.37±0.03a |
|            | 60                         | 5.27±0.02c | 7.29±0.07b | 7.39±0.01b | 5.95±0.04c | 7.44±0.02a | 7.47±0.03a |

(H) Paddy soil – (L) Red soil – (15) 15°C incubation temp. (25) 25°C incubation temp. (C) Control – (B) addition of biochar – (P) inorganic P amendment

**Table S2** Effect of biochar and inorganic P amendment on soil available P on different incubation intervals.

| Soil Type  | Incubation days/Treatments | HC15 (mgkg <sup>-1</sup> ) | HB15(mgkg <sup>-1</sup> ) | HP15(mgkg <sup>-1</sup> ) | HC25 (mgkg <sup>-1</sup> ) | HB25(mgkg <sup>-1</sup> ) | HP25(mgkg <sup>-1</sup> ) |
|------------|----------------------------|----------------------------|---------------------------|---------------------------|----------------------------|---------------------------|---------------------------|
| Paddy soil | 10                         | 13.41± 0.14 b              | 44.37± 0.93a              | 44.63 ±1.03a              | 13.33± 0.21b               | 46.37 ±0.93a              | 46.62 ±1.04a              |
|            | 20                         | 13.34 ±0.14d               | 55.37 ±0.93 c             | 61.33 ±1.77b              | 13.42 ±0.22d               | 61.33 ±1.45b              | 66.73± 0.93a              |
|            | 30                         | 14.78 ±0.11 c              | 75.43 ±1.11a              | 77.17 ±1.28a              | 14.84 ±0.07c               | 71.00 ±1.15b              | 75.33 ±0.82a              |
|            | 40                         | 14.80± 0.11 c              | 79.33 ±0.93b              | 81.87 ±0.41a              | 14.33 ±0.10c               | 77.40 ±1.15b              | 81.73± 0.82a              |
|            | 50                         | 13.61 ±0.14c               | 85.46 ±1.30b              | 88.23±2.06b               | 13.57± 0.05c               | 88.40±1.15b               | 99.07 ±1.21a              |
|            | 60                         | 13.42±0.14 d               | 92.67 ±2.49c              | 111.47 ±2.57a             | 13.37±0.05d                | 93.78 ±1.92c              | 100.17± 3.03b             |
| Red soil   |                            | <b>LC15</b>                | <b>LB15</b>               | <b>LP15</b>               | <b>LC25</b>                | <b>LB25</b>               | <b>LP25</b>               |
|            | 10                         | 5.41 ±0.03c                | 35.38 ±0.93b              | 35.60 ±1.03 b             | 5.33 ±0.02 c               | 38.37 ±0.93 a             | 38.63 ±1.03 a             |
|            | 20                         | 5.42 ±0.14 d               | 47.37± 0.93c              | 53.33±1.7b                | 5.34± 0.02d                | 53.67± 1.4b               | 58.73 ±0.93 a             |
|            | 30                         | 6.78 ±0.11d                | 67.43 ±1.10 c             | 69.17 ±1.28b              | 6.84 ±0.07d                | 63.00 ±1.15 b             | 67.33± 0.82a              |
|            | 40                         | 6.80 ± 0.10c               | 71.33 ±0.92 b             | 73.87 ±0.41 a             | 6.30 ±0.10c                | 69.40± 1.15b              | 73.73 ±0.82a              |
|            | 50                         | 5.61 ± 0.15c               | 77.47±1.29b               | 80.23 ±2.06b              | 5.57 ± 0.05c               | 80.40±1.15b               | 84.73 ±0.82 a             |
|            | 60                         | 5.42 ±0.02c                | 84.67±2.49b               | 103.47±2.57a              | 5.37 ±0.04c                | 85.78 ±1.93b              | 92.17 ±3.03b              |

(H) Paddy soil – (L) Red soil – (15) 15°C incubation temp. (25) 25°C incubation temp. (C) Control – (B) addition of biochar – (P) inorganic P amendment

**Table S3** Effect of biochar and inorganic P amendment on soil acid phosphatase activity on different incubation intervals.

| Soil Type  | Incubation days /Treatments | HC15( $\mu\text{gPNP g}^{-1}\text{soil h}^{-1}$ ) | HB15 ( $\mu\text{gPNP g}^{-1}\text{soil h}^{-1}$ ) | HP15 ( $\mu\text{gPNP g}^{-1}\text{soil h}^{-1}$ )b | HC25 ( $\mu\text{gPNP g}^{-1}\text{soil h}^{-1}$ ) | HB25 ( $\mu\text{gPNP g}^{-1}\text{soil h}^{-1}$ ) | HP25 ( $\mu\text{gPNP g}^{-1}\text{soil h}^{-1}$ ) |
|------------|-----------------------------|---------------------------------------------------|----------------------------------------------------|-----------------------------------------------------|----------------------------------------------------|----------------------------------------------------|----------------------------------------------------|
| Paddy soil | 10                          | 6.86 $\pm$ 0.01a                                  | 2.65 $\pm$ 0.33d                                   | 1.26 $\pm$ 0.04d                                    | 7.15 $\pm$ 0.06b                                   | 2.3 $\pm$ 0.28c                                    | 1.38 $\pm$ 0.016d                                  |
|            | 20                          | 7.27 $\pm$ 0.11a                                  | 2.29 $\pm$ 0.28b                                   | 1.23 $\pm$ 0.04c                                    | 7.24 $\pm$ 0.11a                                   | 1.93 $\pm$ 0.05c                                   | 1.20 $\pm$ 0.04c                                   |
|            | 30                          | 7.24 $\pm$ 0.11a                                  | 2.03 $\pm$ 0.08b                                   | 1.17 $\pm$ 0.04c                                    | 7.25 $\pm$ 0.11a                                   | 2.24 $\pm$ 0.28b                                   | 1.18 $\pm$ 0.04c                                   |
|            | 40                          | 7.22 $\pm$ 0.11a                                  | 2.21 $\pm$ 0.28b                                   | 1.15 $\pm$ 0.04c                                    | 7.23 $\pm$ 0.11a                                   | 2.02 $\pm$ 0.08b                                   | 1.16 $\pm$ 0.04c                                   |
|            | 50                          | 7.19 $\pm$ 0.11a                                  | 1.98 $\pm$ 0.08c                                   | 1.12 $\pm$ 0.04d                                    | 7.20 $\pm$ 0.11a                                   | 2.12 $\pm$ 0.21b                                   | 1.13 $\pm$ 0.04d                                   |
|            | 60                          | 7.78 $\pm$ 0.11a                                  | 1.15 $\pm$ 0.12d                                   | 1.21 $\pm$ 0.80c                                    | 6.81 $\pm$ 0.04a                                   | 2.08 $\pm$ 0.13b                                   | 1.12 $\pm$ 0.06d                                   |
| Red soil   |                             | <b>LC15</b>                                       | <b>LB15</b>                                        | <b>LP15</b>                                         | <b>LC25</b>                                        | <b>LB25</b>                                        | <b>LP25</b>                                        |
|            | 10                          | 7.63 $\pm$ 0.22a                                  | 1.17 $\pm$ 0.02d                                   | 1.23 $\pm$ 0.07d                                    | 6.83 $\pm$ 0.44b                                   | 2.1 $\pm$ 0.13c                                    | 1.14 $\pm$ 1.31d                                   |
|            | 20                          | 6.87 $\pm$ 0.01a                                  | 2.67 $\pm$ 0.33b                                   | 1.28 $\pm$ 0.04c                                    | 7.3 $\pm$ 0.11a                                    | 2.32 $\pm$ 0.28b                                   | 1.18 $\pm$ 0.05c                                   |
|            | 30                          | 7.26 $\pm$ 0.01a                                  | 2.64 $\pm$ 0.33c                                   | 1.25 $\pm$ 0.04c                                    | 7.29 $\pm$ 0.02a                                   | 2.28 $\pm$ 0.28b                                   | 1.22 $\pm$ 0.08c                                   |
|            | 40                          | 7.26 $\pm$ 0.01a                                  | 2.25 $\pm$ 0.28b                                   | 1.19 $\pm$ 0.04c                                    | 7.27 $\pm$ 0.11a                                   | 2.26 $\pm$ 0.28b                                   | 1.2 $\pm$ 0.45c                                    |
|            | 50                          | 7.24 $\pm$ 0.01a                                  | 2.23 $\pm$ 0.28b                                   | 1.17 $\pm$ 0.04c                                    | 7.25 $\pm$ 0.17a                                   | 2.24 $\pm$ 0.28b                                   | 1.18 $\pm$ 0.28c                                   |
|            | 60                          | 7.21 $\pm$ 0.01a                                  | 2.2 $\pm$ 0.28b                                    | 1.14 $\pm$ 0.05c                                    | 7.22 $\pm$ 0.11a                                   | 2.21 $\pm$ 0.28b                                   | 1.15 $\pm$ 0.28c                                   |

(H) Paddy soil – (L) Red soil – (15) 15°C incubation temp. (25) 25°C incubation temp. (C) Control – (B) addition of biochar – (P) inorganic P amendment

**Table S4** Changes in the diversity and richness indices of the soil bacterial communities in different treatments.

| Treatments  | Simpson    | Chao1            | ACE              | Shannon     | Treatments  | Simpson    | Chao1           | ACE            | Shannon    |
|-------------|------------|------------------|------------------|-------------|-------------|------------|-----------------|----------------|------------|
| <b>HC15</b> | 0.98±0.00b | 2399.95±271.78ab | 2460.10±275.99ab | 9.07±0.01a  | <b>LC15</b> | 0.99±0.00a | 1767.57±66.47cd | 1900.99±62.04c | 8.30±0.08d |
| <b>HB15</b> | 0.99±0.00a | 2459.48±290.87ab | 2674.67±207.20a  | 8.97±0.29a  | <b>LB15</b> | 0.99±0.00a | 1952.94±40.59b  | 2096.65±43.20b | 8.63±0.03b |
| <b>HP15</b> | 0.99±0.00a | 2575.12±249.50a  | 2736.67±266.57a  | 9.09±0.046a | <b>LP15</b> | 0.98±0.00b | 1729.89±23.32d  | 1838.21±27.51d | 8.17±0.10d |
| <b>HC25</b> | 0.98±0.00b | 1671.12±67.38b   | 1711.25±106.40b  | 8.26±0.087b | <b>LC25</b> | 0.99±0.00a | 1614.60±32.97d  | 1706.20±31.21d | 8.47±0.02c |
| <b>HB25</b> | 0.99±0.00a | 2155.26±241.29ab | 2346.62±310.90ab | 8.49±0.13b  | <b>LB25</b> | 0.99±0.00a | 2367.09±7.20a   | 2505.78±49.55a | 8.89±0.03a |
| <b>HP25</b> | 0.96±0.01c | 2046.07±281.01ab | 2176.75±330.14ab | 7.81±0.20c  | <b>LP25</b> | 0.98±0.00b | 1915.30±78.13b  | 2082.99±92.51b | 8.10±0.13d |

(H) Paddy soil – (L) Red soil – (15) 15°C incubation temp. (25) 25°C incubation temp. (C) Control – (B) addition of biochar – (P) inorganic P amendment
